# Supplementary material for: A type IV modification-dependent restriction enzyme SauUSI from Staphylococcus aureus subsp. aureus USA300
Source: PubMed Central journal article supplement — Nucleic Acids Res. 2011 Mar 17;39(13):5597–610. doi: 10.1093/nar/gkr098 (PMC3141236; doi:10.1093/nar/gkr098), 2011-03-17
Supplement: supp_gkr098_SauUSI_supplement_figures_1_to_7.pdf [file supp_gkr098_SauUSI_supplement_figures_1_to_7.pdf]

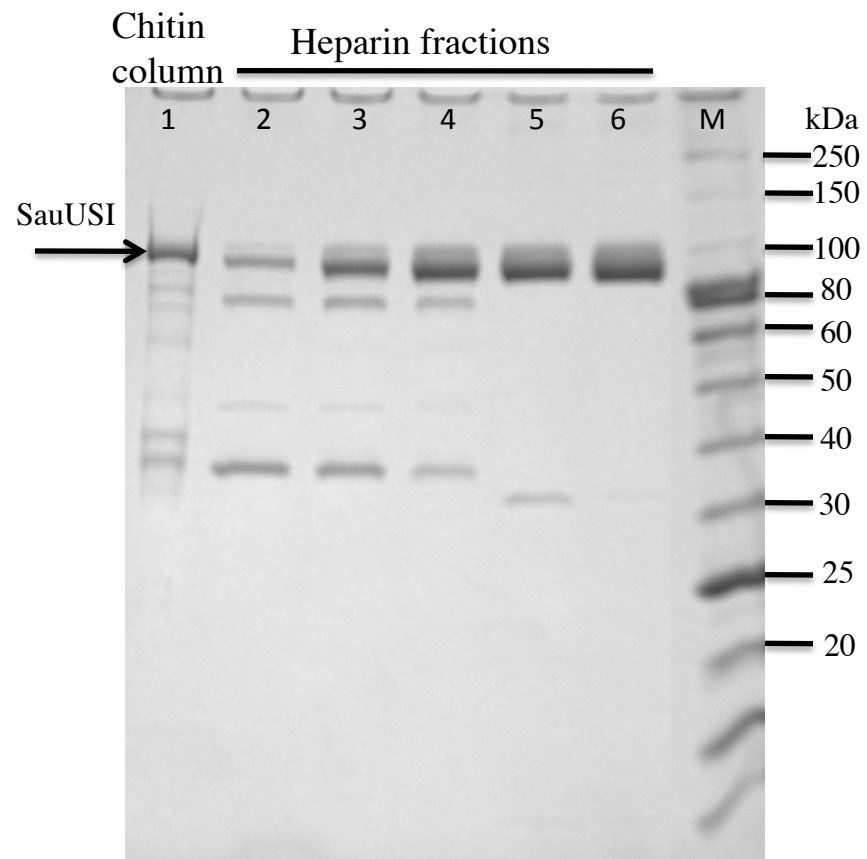

Supplementary **Figure S1**

Min: 2 4 6 10 20 30 40 60 - L

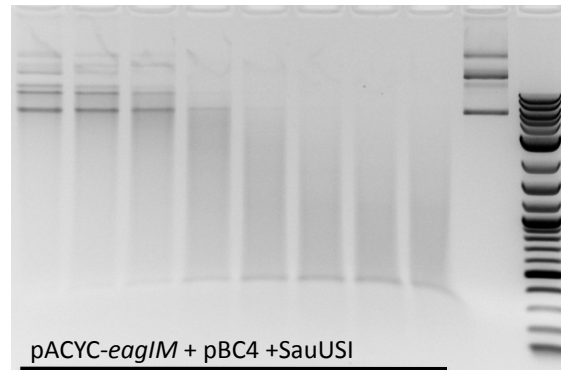

Supplementary **Figure S2**

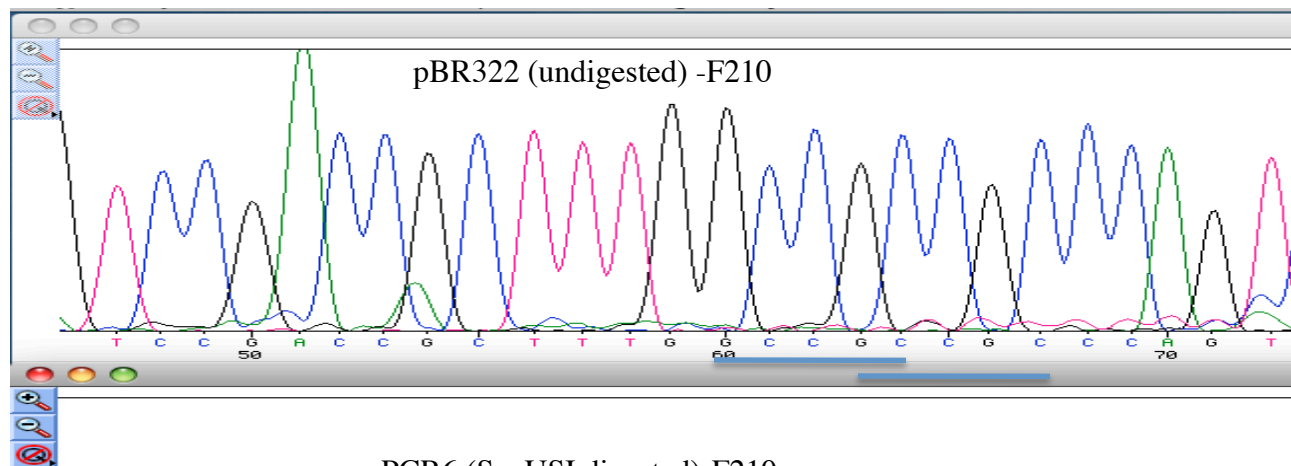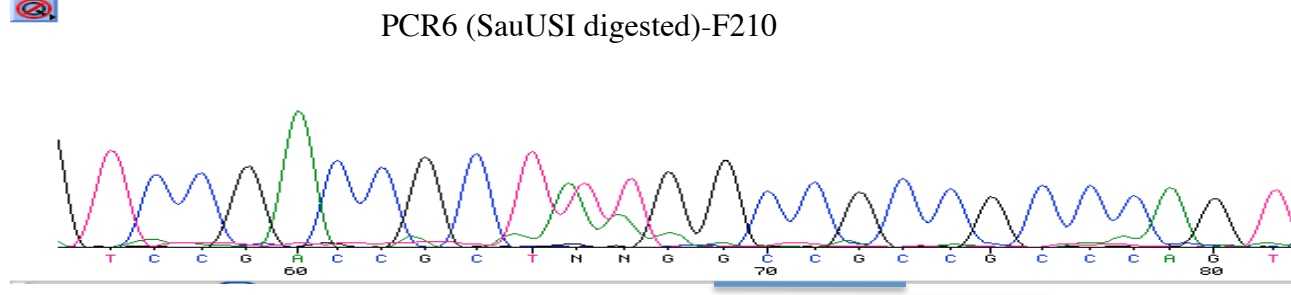

Primer  
 F210 → 5' TCCGACCGCTWWG**CGGCC**CGCCCAGT 3' (sequencing read)  
 3' AGGCTGGCGAAAC**CGGCC**GCGGGTCA 5' (template strand)

↑↑

Supplementary Figure S3

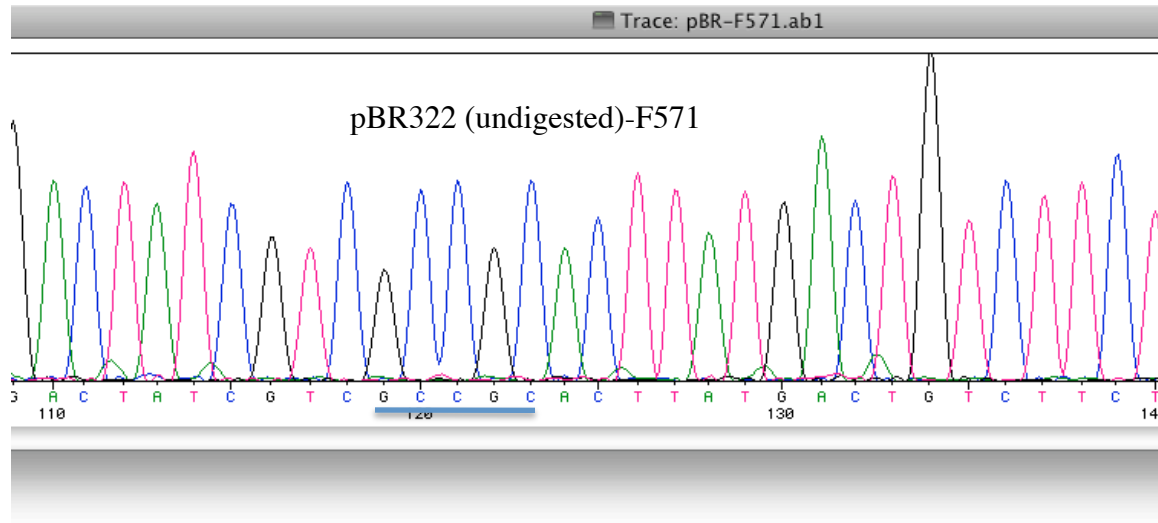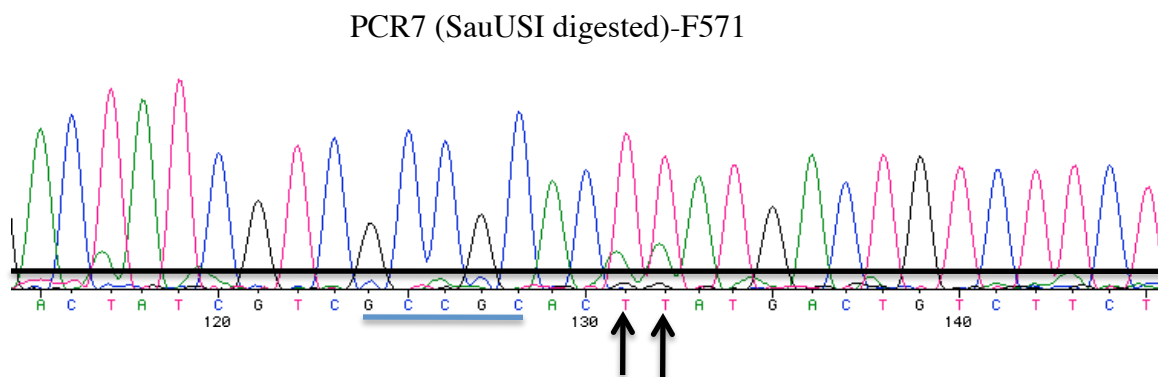

5' ACTATCGT**C****GGCGC**ACWWATGACTGTCTTCT 3' (Sequencing read)  
 3' TGATAGCAG**CGGCGT**GAATACTGACAGAAGA 5' (template strand)

↑↑

Supplementary Figure S4

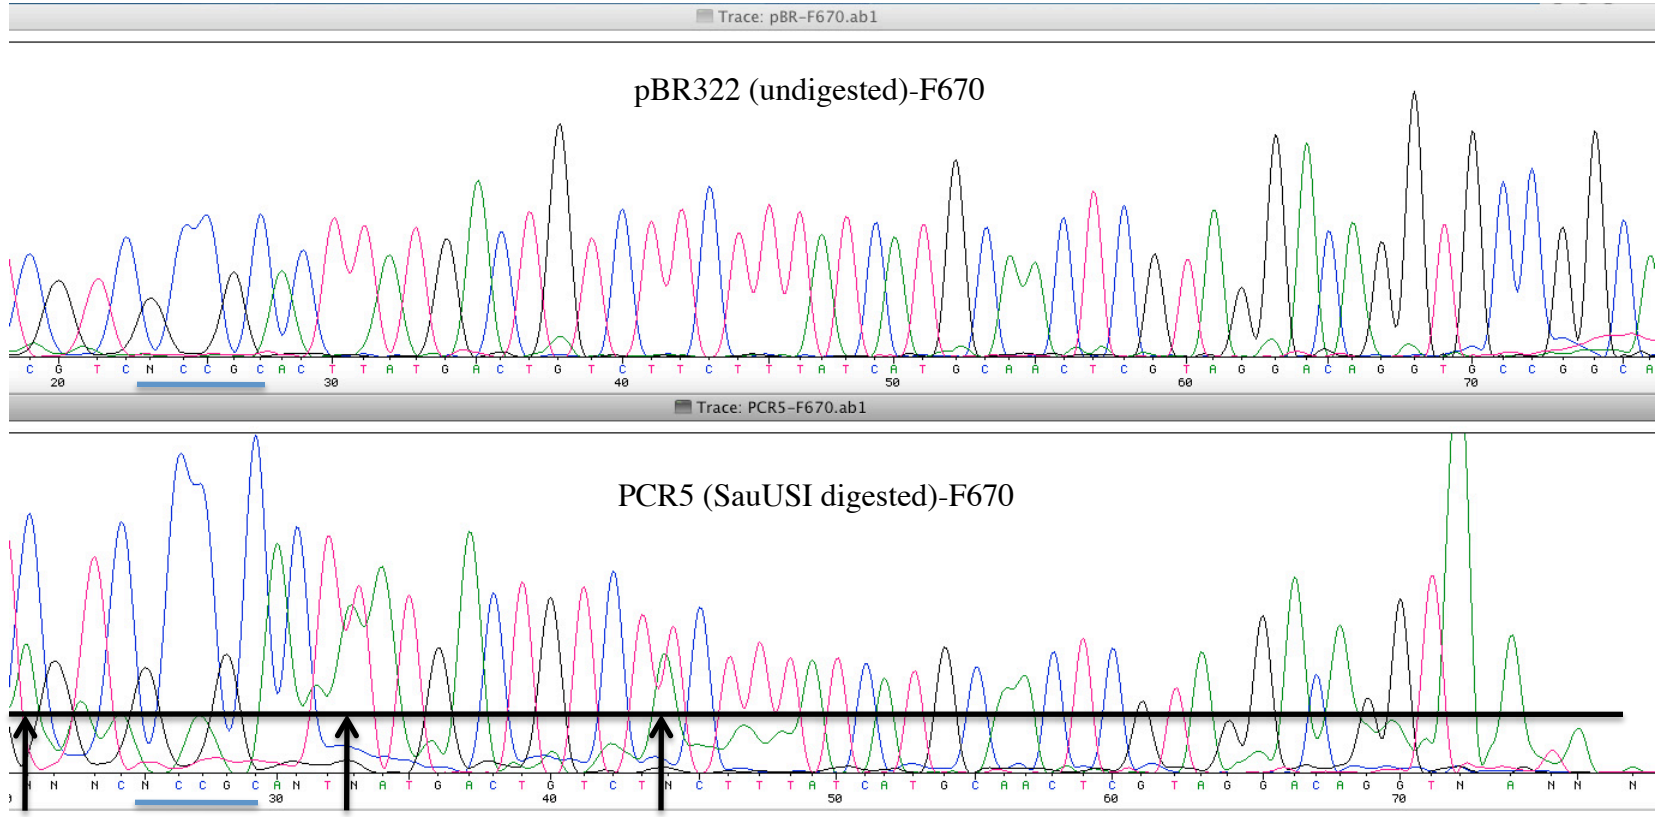

Primer

F670

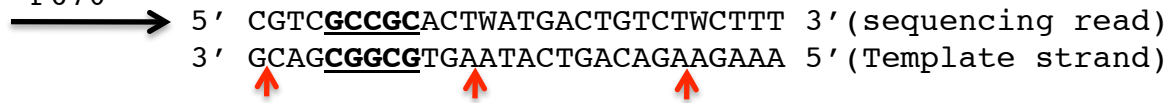

Supplementary Figure S5

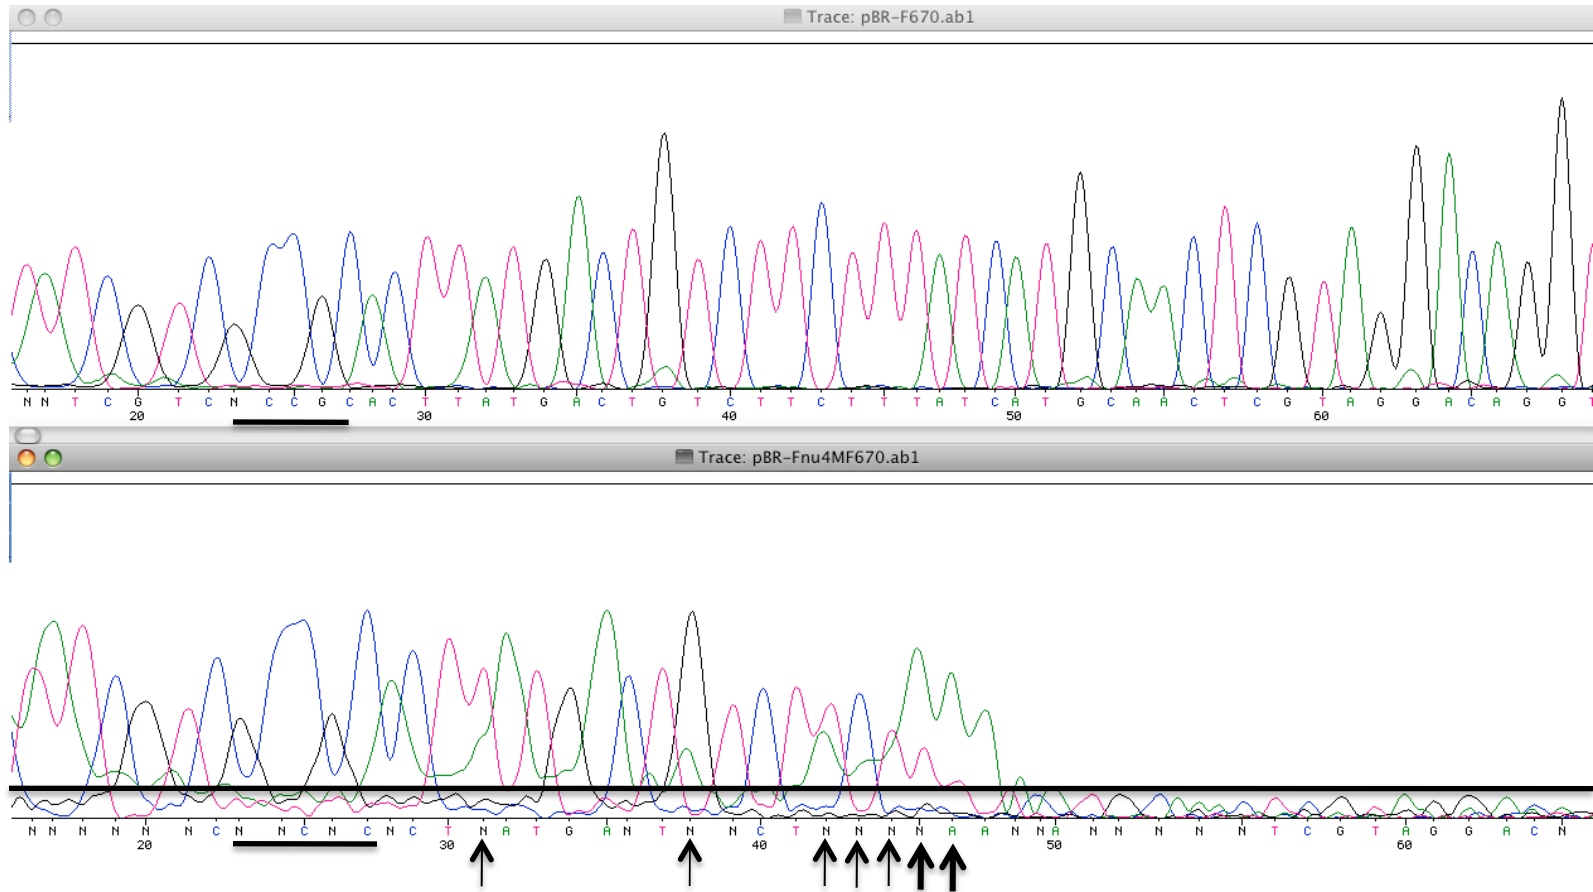

Primer F670

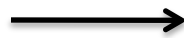

5' TATCGTCGCCGCACTWATGACTRTCCTWCWWW 3' (sequencing read)

3' ATAGCAGCGGCGTGAATACTGACAGAAGAAA 5'

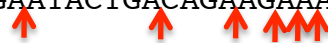

Supplementary Figure S6

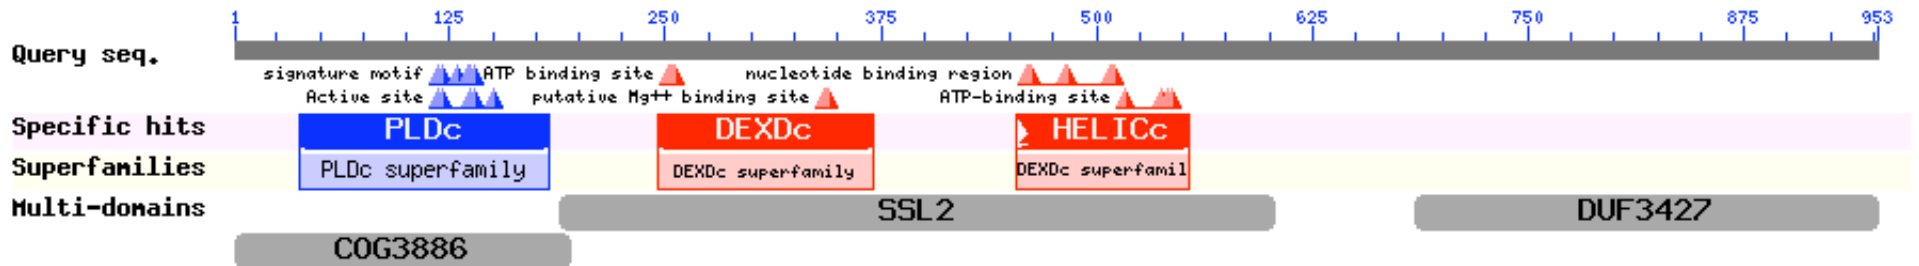

Organism : *S.aureus\_USA300*

Gene : SAUSA300\_2431

Definition : putative helicase

| Motif id               | From | To  | Definition                                                        | E value | Score |
|------------------------|------|-----|-------------------------------------------------------------------|---------|-------|
| pf:ResIII              | 221  | 373 | Type III restriction enzyme, res subunit                          | 1e-33   | -     |
| pf:DEAD                | 227  | 372 | DEAD/DEAH box helicase                                            | 3.6e-05 | -     |
| ps:HELICASE_ATP_BIND_1 | 236  | 389 | Superfamilies 1 and 2 helicase ATP-binding type-1 domain profile. | -       | 2231  |
| pf:DUF2075             | 250  | 350 | Uncharacterized conserved protein (DUF2075)                       | 0.0014  | -     |
| pf:MmII                | 388  | 438 | Methylmuconolactone methyl-isomerase                              | 0.082   | -     |
| ps:HELICASE_CTER       | 440  | 592 | Superfamilies 1 and 2 helicase C-terminal domain profile.         | -       | 2678  |
| pf:Helicase_C          | 470  | 545 | Helicase conserved C-terminal domain                              | 2.5e-13 | -     |
| pf:DUF3427             | 685  | 953 | Domain of unknown function (DUF3427)                              | 1.6e-72 | -     |

Search GENES with the same motifs

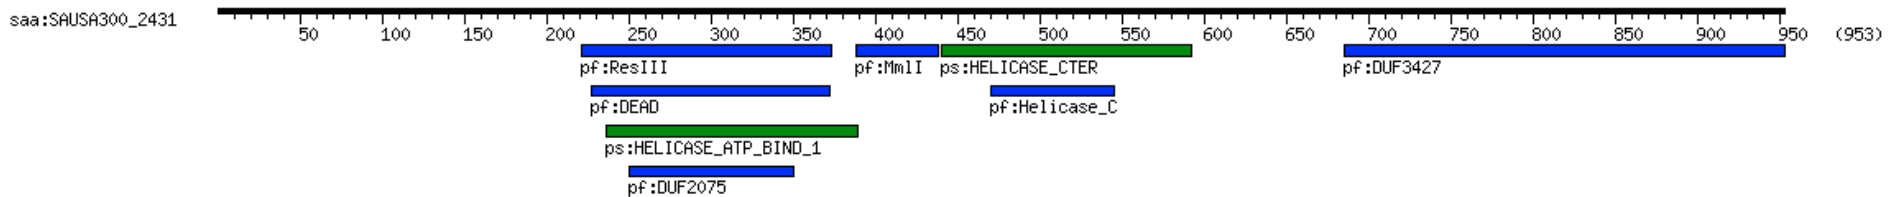

Supplementary Figure S7
